# Supplementary material for: Dismal Outcomes and High Societal Burden of Mitral Valve Regurgitation in France in the Recent Era: A Nationwide Perspective
Source: PubMed Central journal article supplement — J Am Heart Assoc. 2020 Jul 22;9(15):e016086. doi: 10.1161/JAHA.120.016086 (PMC7792268; doi:10.1161/jaha.120.016086), 2020-07-22
Supplement: JAH3-9-e016086-s001.pdf [file JAH3-9-e016086-s001.pdf]

# **Supplemental Material**

**Table S1. Odd ratios [95% confidence intervals] associated with age and occurrence of in-hospital death, one-year death, one-year death or all-cause readmission and one-year all-cause death or readmission for heart failure.**

|                                                     | <b>In-hospital death</b> | <b>One-year death</b>    | <b>One-year death or all-cause readmission</b> | <b>One-year all-cause death or readmission for heart failure</b> |
|-----------------------------------------------------|--------------------------|--------------------------|------------------------------------------------|------------------------------------------------------------------|
| <b>Age, per 5 years</b>                             | <b>1.26 [1.24-1.28]</b>  | <b>1.23 [1.22-1.24]</b>  | <b>1.04 [1.031-1.04]</b>                       | <b>1.15 [1.14-1.16]</b>                                          |
| <b>Charlson index, per unit</b>                     | <b>1.13 [1.12-1.14]</b>  | <b>1.17 [1.16-1.18]</b>  | <b>1.14 [1.13-1.15]</b>                        | <b>1.15 [1.14-1.16]</b>                                          |
| <b>Heart failure at presentation</b>                | <b>1.96 [1.83-2.10]</b>  | <b>1.83 [1.76-1.90]</b>  | <b>1.44 [1.39-1.48]</b>                        | <b>3.48 [3.39-3.59]</b>                                          |
| <b>Secondary (vs. primary) mitral regurgitation</b> | <b>1.22 [1.14-1.31]</b>  | <b>1.14 [ 1.10-1.19]</b> | <b>1.29 [1.25-1.33]</b>                        | <b>1.48 [1.44-1.53]</b>                                          |
